# Supplementary material for: Microbial diversity and antimicrobial resistance in faecal samples from acute medical patients assessed through metagenomic sequencing
Source: PubMed Central journal article supplement (PMC10019653; doi:10.1371/journal.pone.0282584), 2023-03-16

S3 Figure. Resistance gene diversity in faecal samples from three hospital sites over time.

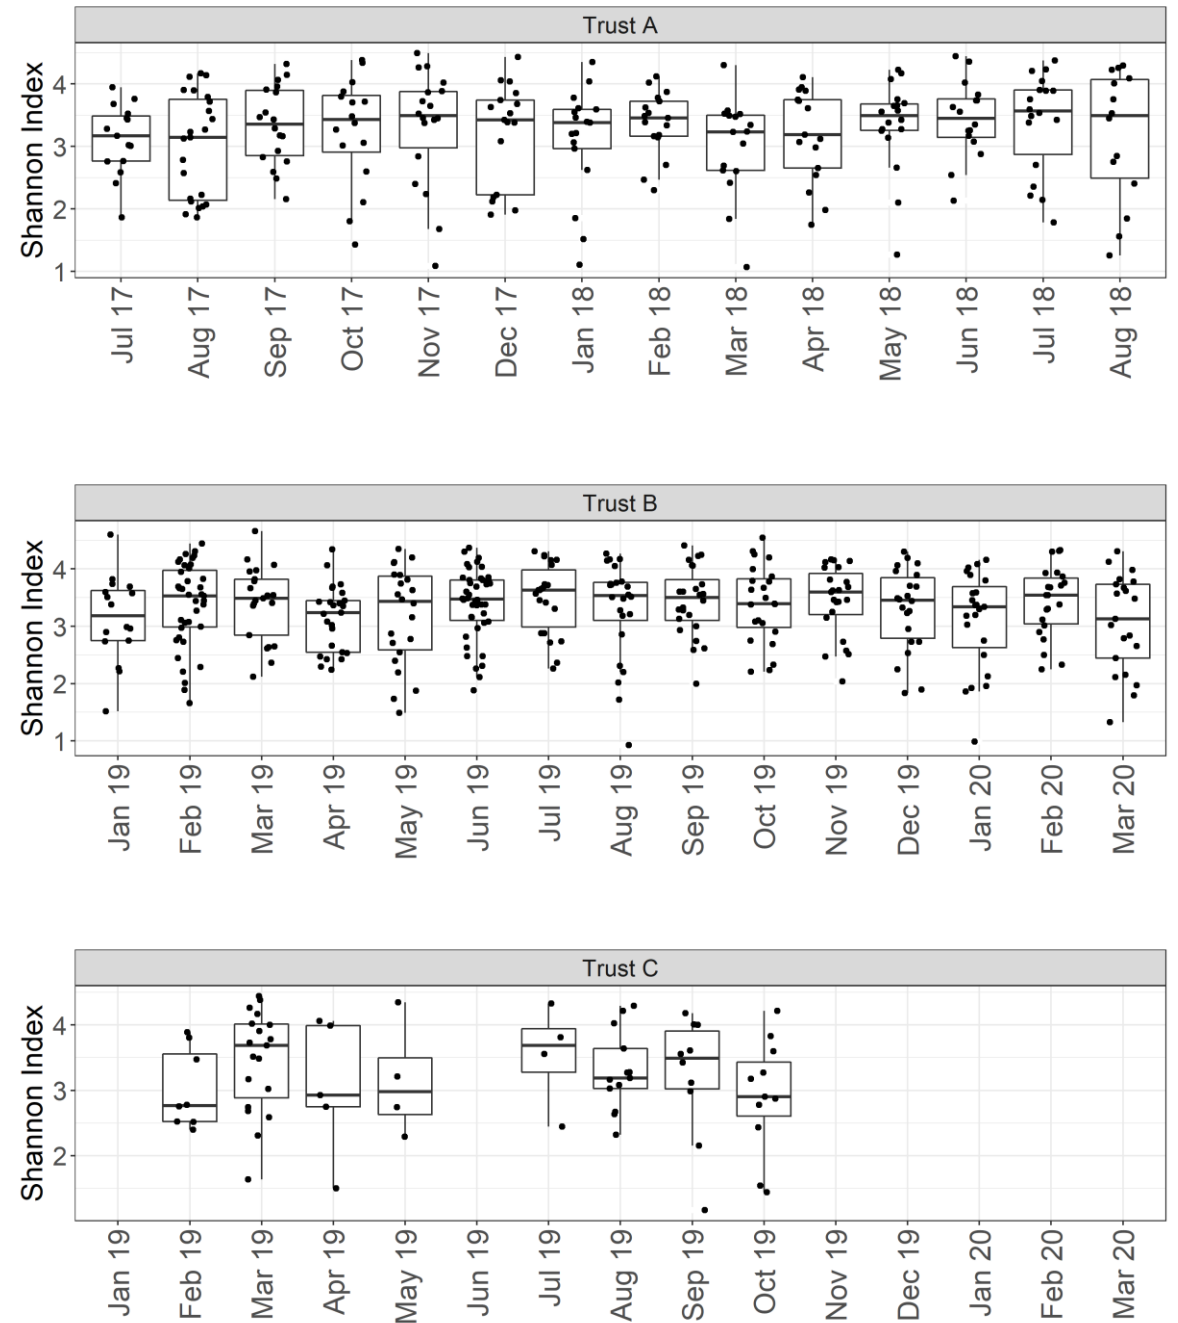

Supplement: pone.0282584.s003.pdf [file pone.0282584.s003.pdf]
