# Supplementary material for: Microbial diversity and antimicrobial resistance in faecal samples from acute medical patients assessed through metagenomic sequencing
Source: PubMed Central journal article supplement (PMC10019653; doi:10.1371/journal.pone.0282584), 2023-03-16
Supplement: pone.0282584.s005.pdf [file pone.0282584.s005.pdf]

S1 Table. Samples received and sequenced in the study

| month  | Trust A        |                |                  |                          | Trust B        |                |                  |                          | Trust C        |                |                  |                          |
|--------|----------------|----------------|------------------|--------------------------|----------------|----------------|------------------|--------------------------|----------------|----------------|------------------|--------------------------|
|        | total received | number prepped | number sequenced | number used for analysis | total received | number prepped | number sequenced | number used for analysis | total received | number prepped | number sequenced | number used for analysis |
| Jul-17 | 25             | 25             | 16               | 15                       |                |                |                  |                          |                |                |                  |                          |
| Aug-17 | 41             | 36             | 23               | 23                       |                |                |                  |                          |                |                |                  |                          |
| Sep-17 | 37             | 26             | 18               | 18                       |                |                |                  |                          |                |                |                  |                          |
| Oct-17 | 37             | 23             | 18               | 16                       |                |                |                  |                          |                |                |                  |                          |
| Nov-17 | 68             | 25             | 18               | 18                       |                |                |                  |                          |                |                |                  |                          |
| Dec-17 | 46             | 23             | 18               | 17                       |                |                |                  |                          |                |                |                  |                          |
| Jan-18 | 43             | 26             | 18               | 17                       |                |                |                  |                          |                |                |                  |                          |
| Feb-18 | 49             | 23             | 18               | 17                       |                |                |                  |                          |                |                |                  |                          |
| Mar-18 | 69             | 22             | 18               | 16                       |                |                |                  |                          |                |                |                  |                          |
| Apr-18 | 54             | 23             | 18               | 17                       |                |                |                  |                          |                |                |                  |                          |
| May-18 | 45             | 24             | 19               | 18                       |                |                |                  |                          |                |                |                  |                          |
| Jun-18 | 48             | 33             | 20               | 16                       |                |                |                  |                          |                |                |                  |                          |
| Jul-18 | 35             | 31             | 21               | 18                       |                |                |                  |                          |                |                |                  |                          |
| Aug-18 | 45             | 25             | 20               | 14                       |                |                |                  |                          |                |                |                  |                          |
| Jan-19 |                |                |                  |                          | 66             | 25             | 19               | 16                       |                |                |                  |                          |
| Feb-19 |                |                |                  |                          | 83             | 58             | 42               | 39                       | 10             | 10             | 9                | 8                        |
| Mar-19 |                |                |                  |                          | 142            | 25             | 23               | 21                       | 88             | 28             | 21               | 19                       |
| Apr-19 |                |                |                  |                          | 200            | 27             | 26               | 25                       | 7              | 7              | 5                | 5                        |
| May-19 |                |                |                  |                          | 204            | 24             | 23               | 22                       | 7              | 7              | 6                | 4                        |
| Jun-19 |                |                |                  |                          | 130            | 55             | 43               | 42                       | 0              | 0              | 0                | 0                        |
| Jul-19 |                |                |                  |                          | 205            | 48             | 24               | 22                       | 5              | 5              | 4                | 4                        |
| Aug-19 |                |                |                  |                          | 225            | 26             | 24               | 24                       | 18             | 18             | 17               | 13                       |
| Sep-19 |                |                |                  |                          | 150            | 29             | 25               | 24                       | 11             | 11             | 11               | 10                       |
| Oct-19 |                |                |                  |                          | 81             | 31             | 26               | 23                       | 12             | 12             | 11               | 11                       |
| Nov-19 |                |                |                  |                          | 81             | 24             | 24               | 23                       |                |                |                  |                          |
| Dec-19 |                |                |                  |                          | 81             | 24             | 24               | 22                       |                |                |                  |                          |
| Jan-20 |                |                |                  |                          | 81             | 30             | 27               | 23                       |                |                |                  |                          |
| Feb-20 |                |                |                  |                          | 81             | 25             | 25               | 22                       |                |                |                  |                          |
| Mar-20 |                |                |                  |                          | 44             | 28             | 25               | 21                       |                |                |                  |                          |
|        |                |                |                  |                          |                |                |                  |                          |                |                |                  |                          |
| total  | 642            | 365            | 263              | 240                      | 1854           | 479            | 400              | 369                      | 158            | 98             | 84               | 74                       |
